# Supplementary material for: Novel functional cisplatin carrier based on carbon nanotubes–quercetin nanohybrid induces synergistic anticancer activity against neuroblastoma in vitro
Source: Royal Society of Chemistry journal article supplement (doi:10.1039/c4ra03331k), 2014-07-01
Supplement: c4ra03331k1.pdf [file c4ra03331k1.pdf]

## Supporting Information

### Novel functional Cisplatin carrier based on Carbon Nanotubes - Quercetin nano hybrid induces synergistic anticancer activity against neuroblastoma in vitro

Orazio Vittorio, Miriam Brandl, Giuseppe Cirillo, Umile Gianfranco Spizzirri, Nevio Picci, Maria Kavallaris, Francesca Iemma, Silke Hampel

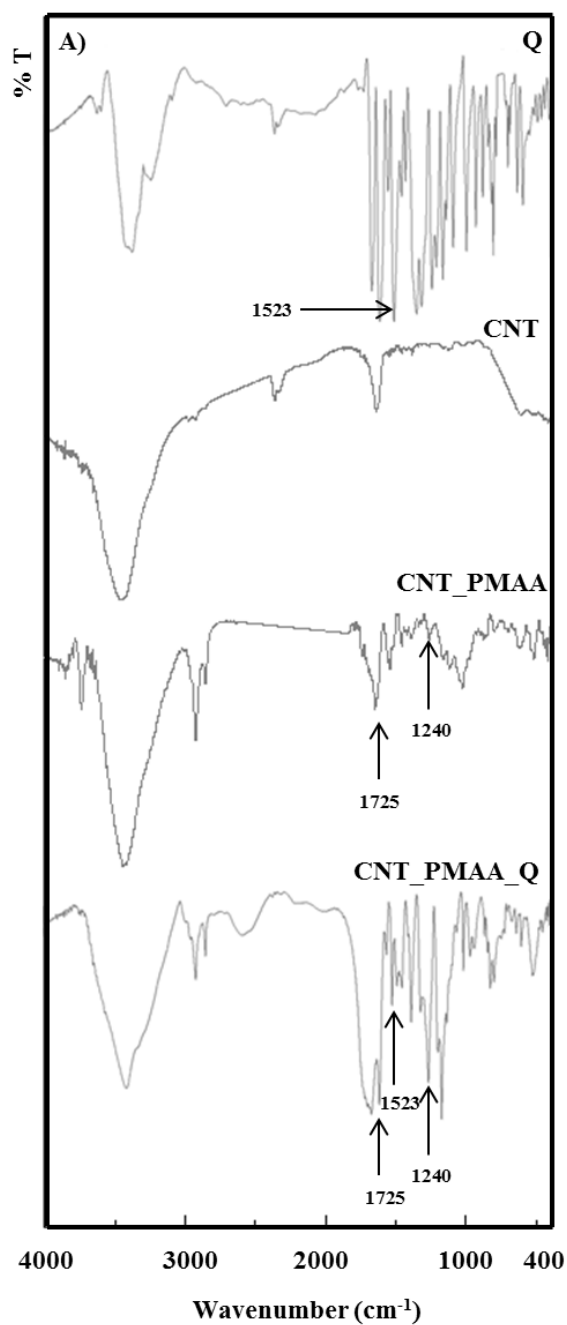

Fig. ESI 1. FT-IR spectra of Q, CNT, CNT\_PMAA and CNT\_PMAA\_Q.
